# Supplementary material for: Overactive PKA signaling underlies the hyperalgesia in an ADHD mouse model
Source: PubMed Central journal article supplement — iScience. 2024 Oct 5;27(11):111110. doi: 10.1016/j.isci.2024.111110 (PMC11539593; doi:10.1016/j.isci.2024.111110), 2024-10-05
Supplement: mmc1.pdf [file mmc1.pdf]

**iScience, Volume 27**

**Supplemental information**

**Overactive PKA signaling underlies  
the hyperalgesia in an ADHD mouse model**

**Danvas Ongwacho Kerosi, Yuan Yin, Panyang Gu, Dengfeng Liu, Meichun Deng, and Jia-Da Li**

1 **Overactive PKA signaling underlies the hyperalgesia in an ADHD mouse model**

2 Danvas Ongwacho Kerosi<sup>1,2,3,4#</sup>, Yuan Yin<sup>1,3#</sup>, Panyang Gu<sup>1,3</sup>, Dengfeng Liu<sup>1,2,3,4\*</sup>, Meichun

3 Deng<sup>1,3\*</sup>, Jia-Da Li<sup>1,2,3,4\*</sup>

4

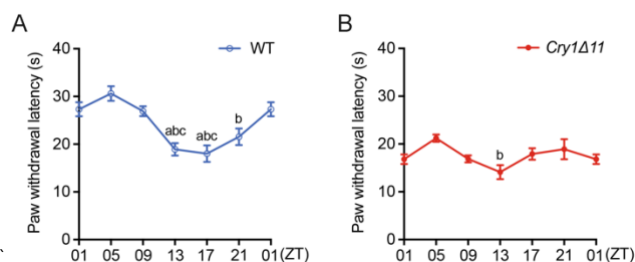

5  
6 **Figure S1. Sidak's multiple comparisons of mean paw withdrawal latencies at different**  
7 **time points for WT (A) and *Cry1Δ11* mice (B), Related to Figure 1.** The letters a, b and c  
8 above the curves indicated the data at that time point was significantly different as compared  
9 to the data at ZT01, ZT05 and ZT09, respectively. Data are presented as mean  $\pm$  SEM (n=5  
10 mice/group/time point). One-way ANOVA with *post hoc* Sidak analysis.

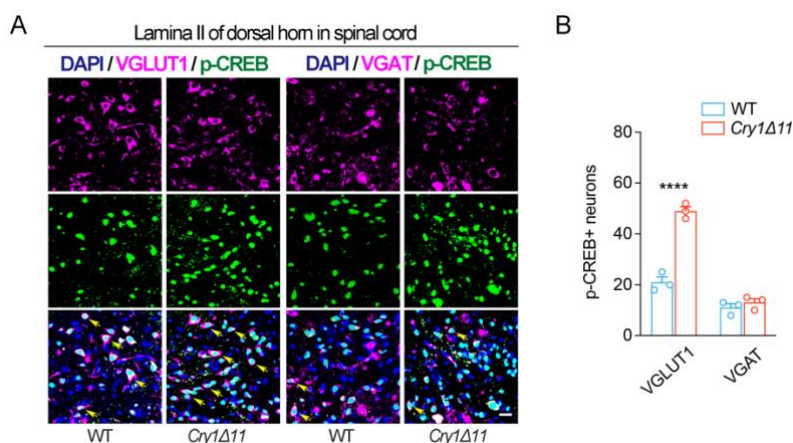

11  
12 **Figure S2. Localization of p-CREB in the excitatory and inhibitory neurons, Related to**  
13 **Figure 3.** (A) Representative immunofluorescence images, showing p-CREB, VGLUT1,  
14 VGAT and DAPI in the spinal cords of WT and *Cry1Δ11* mice. Representative co-localized  
15 neurons are indicated with arrows. (B) Quantification of neurons co-expressing p-  
16 CREB/VGLUT1 or p-CREB/VGAT in the lamina II of the dorsal horn in the spinal cords of  
17 WT and *Cry1Δ11* mice. Data are presented as means  $\pm$  SEM. n=3 mice/genotype; \*\*\*\*P<  
18 0.0001, 2-way ANOVA followed by Bonferroni's *t*-test.

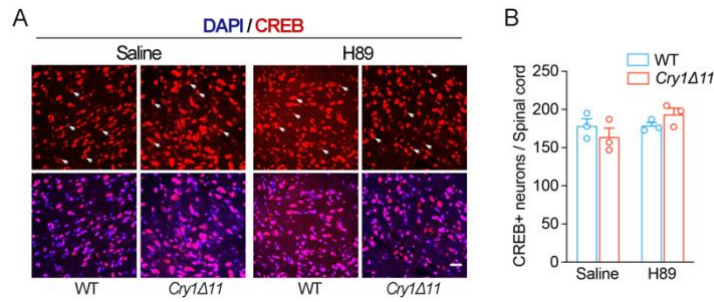

19

20 **Figure S3. H89 treatment did not alter the number of CREB-positive neurons in the**  
 21 **spinal cord, Related to Figure 5. (A) Representative immunofluorescence of CREB in the**  
 22 **lamina II of the dorsal horn in the spinal cords. Representative positive neurons are indicated**  
 23 **with arrows. (B) Quantification of CREB-positive neurons in the spinal cord. n=3 mice.**

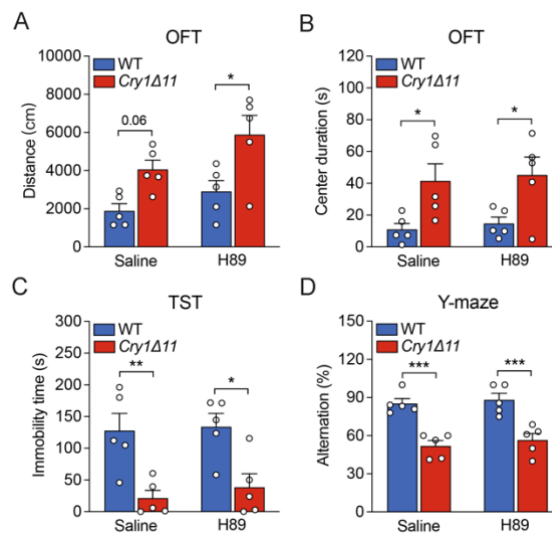

24

25 **Figure S4. H89 treatment did not influence the ADHD-like behaviors in *Cry1Δ11* mice,**  
 26 **Related to Figure 5. Saline or H89 (15 μg/kg) were injected i.t. during ZT01-05 and behaviors**  
 27 **were measured at 60 minutes after injection. OFT, open field test; TST, tail suspension test.**  
 28 **Data are presented as mean ± SEM; n= 5 mice/genotype/treatment, \*P<0.05, \*\*P<0.01, \*\*\*P<**  
 29 **0.001, 2-way ANOVA followed by Bonferroni's *t*-test.**

30

31 **Table S1. The top 30 upregulated putative PKA phosphorylation sites identified in**  
 32 ***Cry1A11* mice, Related to Figure 6.**

| Gene name | Position | Modified sequence | P-value | Gene name | Position | Modified sequence | P-value |
|-----------|----------|-------------------|---------|-----------|----------|-------------------|---------|
| Prx       | S1028    | KVS*              | <0.0001 | Arpc1b    | S310     | KAS*              | 0.0171  |
| Prx       | S979     | RDS*              | 0.0005  | Spire1    | S365     | RHS*              | 0.0037  |
| Plekha1   | S375     | RLS*              | 0.0009  | Spire1    | T370     | RHS*              | 0.0037  |
| Mylk      | S1795    | KSS*              | 0.0156  | Tkt       | S104     | KIS*              | 0.026   |
| Epb41     | S703     | RLS*              | 0.0311  | Baiap3    | S215     | RSS*              | 0.0002  |
| Tnik      | S984     | KIS*              | 0.0124  | Mpz       | S195     | RLS*              | 0.0024  |
| Rasgrp2   | S147     | KMS*              | 0.0152  | Arhgap20  | S669     | KVS*              | 0.0049  |
| Hcls1     | S62      | KVS*              | 0.0311  | Sorbs2    | S339     | RKS*              | 0.0386  |
| Rgl1      | S520     | RLS*              | 0.0264  | Pdlim4    | S119     | RSS*              | 0.0052  |
| Gprc5b    | S368     | KPS*              | 0.0242  | Sh3rf3    | S376     | RHS*              | 0.0095  |
| Plekhg3   | S862     | RES*              | 0.0013  | Shroom3   | S675     | RQS*              | 0.0044  |
| Layn      | S299     | KQS*              | 0.0129  | Plp       | S9       | KVS*              | 0.0018  |
| Map4      | S973     | RVS*              | 0.0045  | Dock2     | S1704    | RSS*              | 0.0309  |
| Gleci1    | S248     | RQS*              | 0.0031  | Plxnc1    | S984     | KQS*              | 0.0016  |
| Lrch3     | S415     | RIS*              | 0.0184  | Klc4      | S566     | RSS*              | 0.011   |

33 \*, the phosphorylated Serine/Threonine.

34

35 **Table S2. The top 30 downregulated putative PKA phosphorylation sites identified in**  
 36 ***Cry1A11* mice, Related to Figure 6.**

| Gene name | Position | Modified sequence | P-value | Gene name | Position | Modified sequence | P-value |
|-----------|----------|-------------------|---------|-----------|----------|-------------------|---------|
| Slc4a4    | S1029    | KGS*              | 0.0488  | Clip3     | S399     | KKS*              | 0.0025  |
| Sgsm1     | S229     | RHS*              | 0.0438  | Mepce     | T188     | KSS*              | 0.0006  |
| Ryr1      | S2844    | KIS*              | 0.0006  | Mepce     | S192     | KSS*              | 0.004   |
| Hnrnpc    | S306     | RDS*              | 0.0377  | Pitpnm1   | S600     | RGS*              | 0.0021  |
| Ank2      | S2422    | KES*              | 0.0012  | Nlgn2     | S714     | RLS*              | 0.0005  |
| Rbm10     | S89      | RHS*              | 0.0038  | Cul9      | S1318    | RPS*              | 0.0382  |
| Pitpnc1   | S119     | KGS*              | 0.0078  | Cwc22     | S829     | RDS*              | 0.0206  |
| Pitpnc1   | S122     | KGS*              | 0.0078  | Ube4b     | S674     | KDS*              | 0.0093  |
| Chl1      | S1148    | KGS*              | 0.0149  | Jup       | S665     | RVS*              | 0.0063  |
| Top2b     | S1387    | KAS*              | 0.0039  | Folh1     | S10      | RDS*              | 0.004   |
| Ankrd34b  | S496     | RQS*              | 0.0053  | Hepacam   | S320     | KDS*              | 0.0237  |
| Pitpnm3   | S343     | KQS*              | 0.023   | Srcin1    | S588     | KDS*              | 0.0035  |
| G3bp1     | S7       | KPS*              | 0.0358  | Rbm10     | S723     | RPS*              | 0.0257  |
| Prkar2a   | S96      | RVS*              | 0.0377  | Ifih1     | S302     | RVS*              | 0.0134  |
| Prkaca    | S339     | RVS*              | 0.0055  | Pclo      | S1378    | KVS*              | 0.0011  |

37 \*, the phosphorylated Serine/Threonine.
